# Supplementary material
Source: publisher site journal article supplement (https://www.dovepress.com/article/305850)
Supplement: Supplementary file 1 [file get_supplementary_file.php]

**On-Line Supplement**

# Obstructive and central sleep apnea in first ever ischemic stroke are associated with different time course and autonomic activation

**.Methods**

**.Subjects**

From November 2012 to October 2015, 70 patients with diagnosis of ischemic stroke were screened according to the following inclusion criteria: age between 18 and 75, ischemic stroke, hospitalization in stroke unit within 48 hours from the onset of neurologic symptoms, ECG sinus rhythm. Clinical diagnosis of stroke was established by a neurologist and confirmed by brain MRI scan. Patients with pulmonary or cardio-circulatory unstable clinical conditions, patients with C-PAP or other ventilator treatment in the 3 months preceding the ischemic event and those with impaired state of consciousness or non-ischemic stroke were excluded.

Upon admission to stroke unit demographic characteristics, cardiovascular risk factors, weight, height, neck circumference, smoking habit were assessed. We considered as suffering from arterial hypertension (and included them in the same group) both patients with new evidence of arterial hypertension at the moment of hospitalization and patient already diagnosed and treated for arterial hypertension. National Institutes of Health Stroke Scale (NHISS) and modified Rankin Scale were used to define stroke severity. Sleepiness was analyzed by the Epworth Sleepiness Scale (ESS). In all patients standard biochemical blood tests, continuous ECG monitoring in stroke unit, echocardiography, carotid and transcranial ultrasonography and/or cerebral CT angiography and MRI were performed in order to define stroke etiology and topography.

**.Sleep studies**

Nocturnal breathing investigation was performed within 10 days from stroke onset (median time 3.4 days±SD 1.4) and repeated after 3 months by using a polygraphic device (Resmed Noxturnal Polygraphic device Nox T3 – Iceland). The following parameters were recorded: oro-nasal flow (nasal pressure cannula), abdominal and thoracic efforts, oxygen saturation, position, and heart rate.

Breathing events were manually recognized and scored; apneas were defined as a reduction in airflow ≥ 90% for at least 10 second and hypopneas as a reduction in airflow ≥ 50% associated with oxygen desaturation ≥ 3%. The distinction between obstructive and central events was performed for both apnea and hypopnea on the basis of the criteria defined by American Society of Sleep Medicine. Hypopnea was scored as obstructive if any of the following criteria were met: snoring during the event, increased inspiratory flattening of nasal pressure signal compared to baseline, thoraco-abdominal paradox movements during the event but not during pre-event breathing; hypopnea was scored as central if none of the above mentioned criteria were met.

In presence of an Apnea-Hypopnea Index (AHI) > 5, a patient was classified as follows:

1. Patients suffering from dominant central sleep apnea (d-CSA) if ≥70% of the events were scored as central and the central AHI (AHIc) was > 5;
2. Patients suffering from dominant obstructive sleep apnea (d-OSA) if ≥70% of the events were obstructive in nature and the obstructive AHI (AHIo) was > 5;
3. Patients characterized by a mixed respiratory pattern (MP) if less than 70% of the events could be scored as obstructive or central, and the global AHI was > 5.
4. Patients without respiratory pattern alterations (AHI <5) were classified as having no sleep-disordered breathing (No-SDB).

Cheyne-Stokes breathing was scored if both of the following were met: 1) >3 consecutive central apneas and/or central hypopneas separated by a crescendo/decrescendo change in breathing amplitude with a cycle length of >40 seconds; 2) >5 central apneas and/or hypopneas per hour of sleep associated with the crescendo/decrescendo breathing pattern recorded over >2 hours of monitoring.

**.Pulmonary function tests**

At the time of enrollment, all patients underwent a complete lung function test. Furthermore, the occlusion pressure of the airways within the first 100 msec of inspiration (P0.1 test) was tested in all patients at baseline and after 3 months of follow-up. This is a validated test to study the central respiratory control; it measures the occlusion pressure at the mouth 100 msec after the onset of inspiration, which represents an index of respiratory drive and is independent from the pulmonary mechanical characteristics.

**.Autonomic assessment**

In the acute phase of stroke (within 10 days from the onset of symptoms), and subsequently at the end of follow up, 3 months later, we obtained an indirect assessment of autonomic regulation of the sinus atrial node (SA node). To this end, subjects underwent 5-10 minutes continuous ECG recording (only sinus series were accepted), beat to beat finger arterial pressure monitoring with Finometer device (Finapres Medical Systems. NL), respiratory frequency and ventilation monitoring with pneumotacography. Patients were studied while lying down and again during standing in order to obtain also information on sympathetic excitatory responsiveness.

Cardiac autonomic performance was gauged from baroreflex gain using both the time – time domain baroreflex sensitivity (BRS) - and the frequency domain index -alpha and Heart Rate Variability. To simplify the analysis the latter (usually evaluated by multiple indices of different meaning) was assessed by a unitary integrated Autonomic Nervous System Index (ANSI). ANSI is computed by a radar plot that combines the three Heart Rate Variability measures carrying the major part of variability information: RR interval, RR variance and the difference between normalized Low Frequency component of RR variability during standing and at rest. Individual data points were quantified against a large benchmark population, whereby values range from 0-100 (higher values indicating better performance).

***.Statistical analysis***

Data are presented as mean±standard deviation (SD). Pearson’s linear correlation analysis was performed to assess which variables are correlated with sleep respiratory parameters. The ANOVA analysis was performed to assess differences between patients for the 4 different patterns of SDB. The post-hoc Tukey’s honest statistical difference test for unequal sample sizes was used to compare differences between groups (Spjotvoll & Stoline test). The χ2 test was used to compare the distribution of categorized variables.

The paired t-test was performed to establish changes between baseline and follow-up for all the indices considered. The analysis of variance for repeated measures (MANOVA) was applied to compare changes in AHI or autonomic indices between acute and chronic phase in the 4 groups of patients.

Analysis of covariance (**ANCOVA**) was performed to compare level of baroreflex sensitivity in patients with sovra- or infra-tentorial ischemic lesion according with presence/absence of arterial hypertension.
