# Supplementary material
Source: publisher site journal article supplement (https://www.dovepress.com/article/305850)
Supplement: Supplementary file 2 [file get_supplementary_file.php]

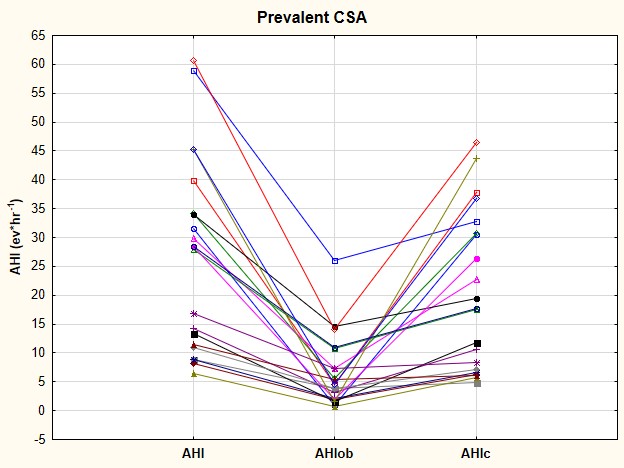


**Figure E1**


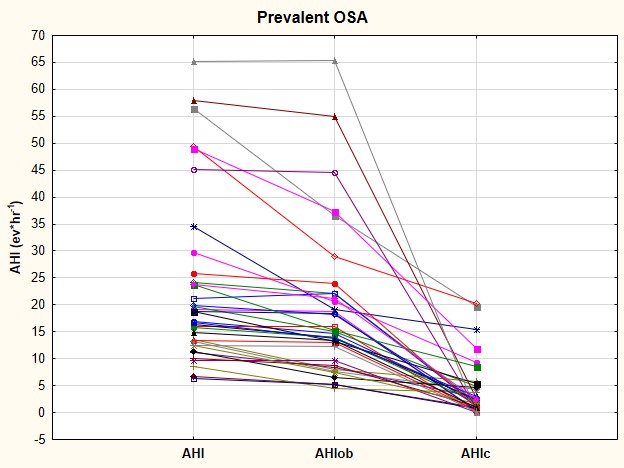


**Figure E2**


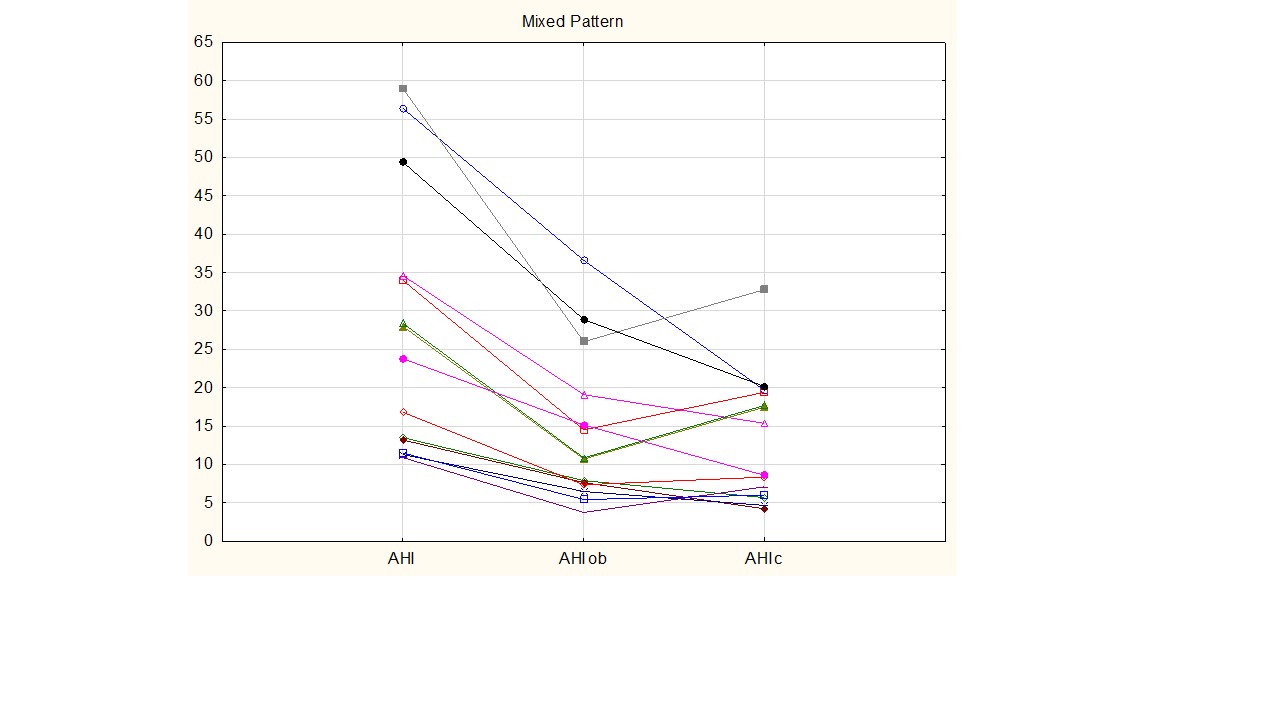


**Figure E3**

**. Legend**

**Figure E1**: Distribution of individual total, obstructive and central AHI in patients with a predominant OSA according to a 50% threshold

**Figure E2**: Distribution of individual total, obstructive and central AHI in patients with a predominant CSA according to a 50% threshold

**Figure E3**: Distribution of individual total, obstructive and central AHI in patients with a Mixed Pattern according to a 70% threshold

**Table E1**

|  | No-SDB  (n=10) | dOSA  (n=36) | dCSA  (n=21) | Total  (n=67) | p |
| --- | --- | --- | --- | --- | --- |
| AGE (yrs) | 56.9±7.9 | 62.9±9 | 59.1± 10.7 | 60.8±9.6 | n.s. |
| BMI (Kg/m2) | 22.6±3.1 | 27.8±4.3 | 27.3±3.5 | 26.8±4.2 | 0.001 |
| ESS | 7.6±5.6 | 9.2±6.2 | 8.3±5 | 8.7±5.7 | n.s. |
| AHI | 4±0.9 | 23±15.5 | 26.8±16.6 | 21.4±16.3 | <0.0001 |
| AHIo | 2.6±1.2 | 18.8±13.7 | 6.3±6.1 | 12.8±13 | 0.019 |
| AHIc | 1.45±1.1 | 4±5.2 | 20.5±13.7 | 8.7±11.6 | <0.0001 |

**Note:** Data are presented as mean ± SD unless otherwise indicated. **Abbreviations:** BMI body mass index. ESS Epworth sleepiness score. AHI apnoea and hypopnea index. AHIo obstructive AHI. AHIc central AHI.No-SDB No sleep disorder breathing. dOSA dominant obstructive sleep apnoea pattern. dCSA dominant central sleep apnoea pattern. MP mixed pattern.
